# Supplementary material for: The salivary microbiota as a diagnostic indicator of oral cancer: A descriptive, non-randomized study of cancer-free and oral squamous cell carcinoma subjects
Source: Springer Nature journal article supplement (doi:10.1186/1479-5876-3-27), 2005-06-30

a

b

c

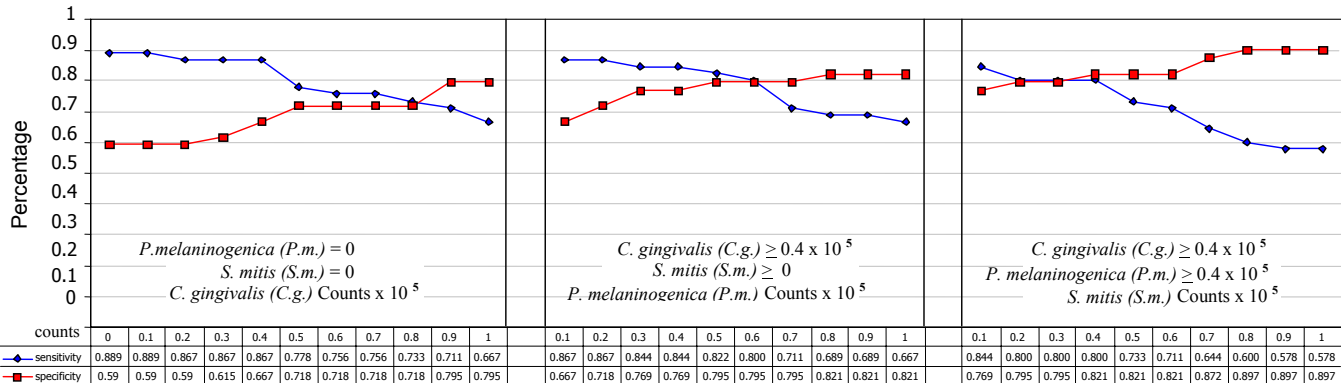

Supplement: 12967_2005_87_MOESM3_ESM.pdf [file 12967_2005_87_MOESM3_ESM.pdf]
